# Supplementary material for: Complementary intestinal mucosa and microbiota responses to caloric restriction
Source: PubMed Central journal article supplement (PMC6063912; doi:10.1038/s41598-018-29815-7), 2018-07-27

Figure S1

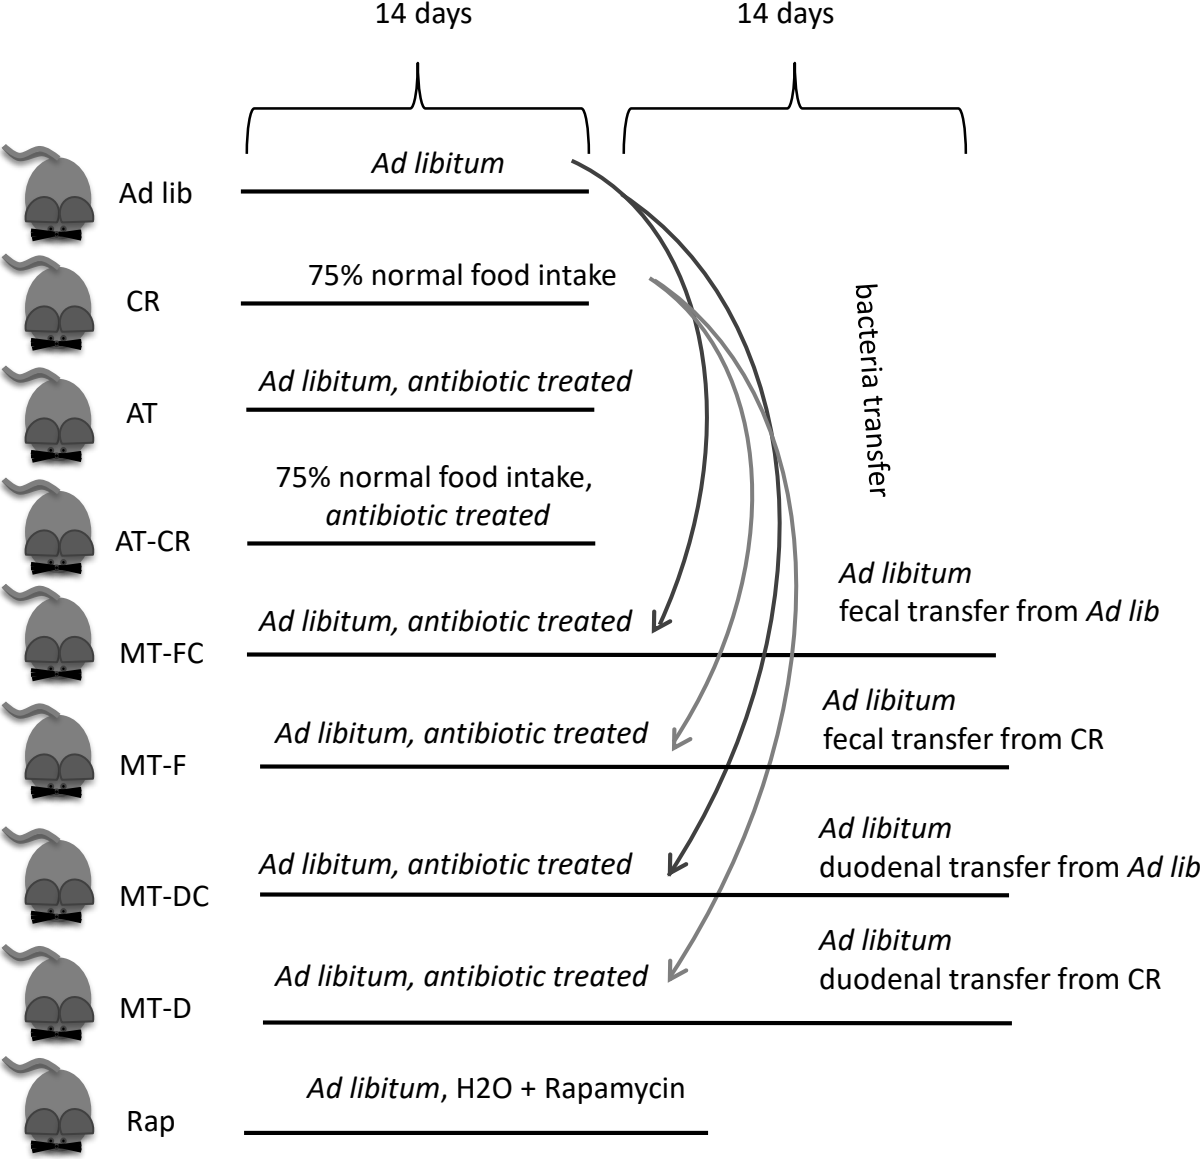

Figure S2

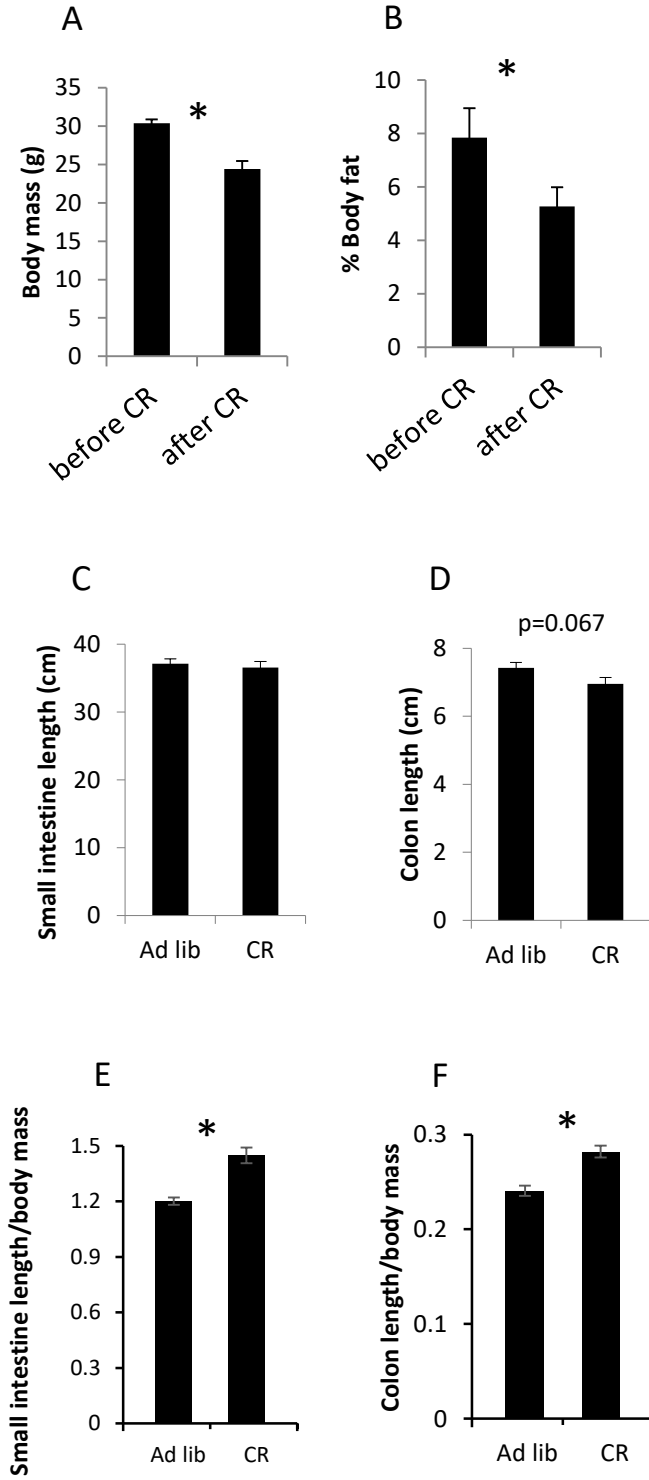

Figure S3

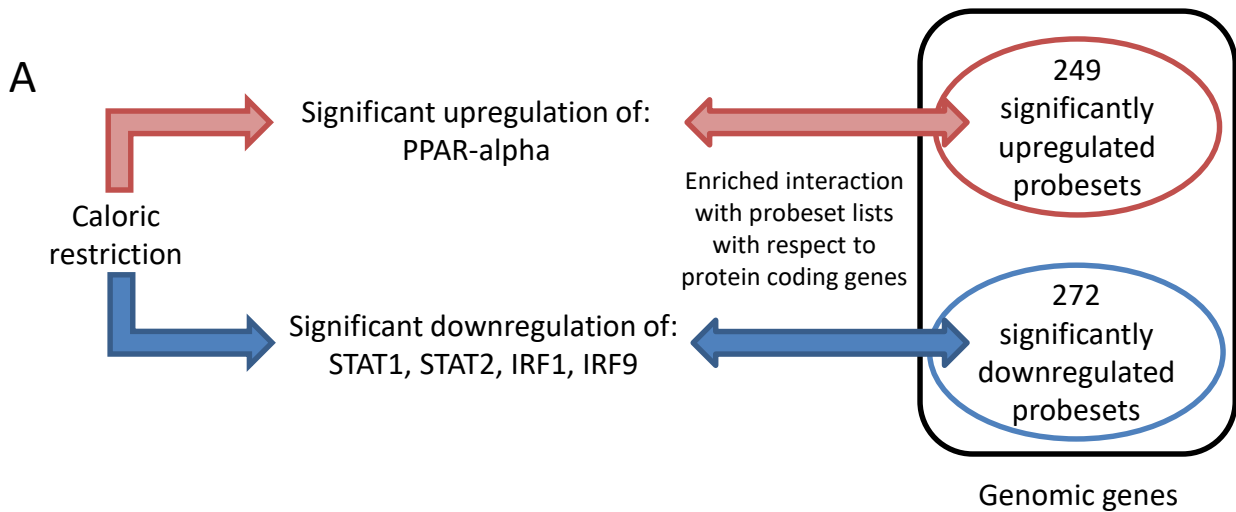

**B** Enriched interactors with the genes upregulated after caloric restriction

|                   |                   |                         |
|-------------------|-------------------|-------------------------|
| Androgen receptor | JunB              | SHP                     |
| AP-2A             | <b>KLF15</b>      | SP1                     |
| APOB              | LXR-alpha         | SP3                     |
| BACH1             | LXR-beta          | <b>SREBP1 (nuclear)</b> |
| <b>BMAL1</b>      | miR-33a-5p        | TCF7L2 (TCF4)           |
| C/EBPalpha        | MIST1             | TR4                     |
| CAR               | NCOA1 (SRC1)      | TWIST2                  |
| c-Fos             | N-CoR             | USF1                    |
| c-Jun             | NFYA              | USF2                    |
| c-Jun/c-Jun       | NRF2              |                         |
| CLOCK             | Oct-1             |                         |
| ESR1 (nuclear)    | p73               |                         |
| FKHR              | Pit3              |                         |
| FOXO3A            | <b>PPAR-alpha</b> |                         |
| GCR-alpha         | PPAR-gamma        |                         |
| HIF1A             | PROX1             |                         |
| HNF1-alpha        | PXR               |                         |
| HNF3-alpha        | RARalpha          |                         |
| HNF3-beta         | ROR-alpha         |                         |
| HNF4-alpha        | RXRA              |                         |

Enriched interactors with the genes downregulated after caloric restriction

|           |                       |              |                          |
|-----------|-----------------------|--------------|--------------------------|
| C/EBPbeta | CD209b                | IL-21        | NF-kB p50/p50            |
| EGR1      | CD74                  | IL-30        | NKRF                     |
|           | CEACAM1               | IL-4         | Nod2 (CARD15)            |
|           | c-IAP2                | IL-7         | <b>OAS1</b>              |
|           | c-Rel (NF-kB subunit) | <b>IP10</b>  | <b>Oas1b</b>             |
|           | Fibronectin           | <b>IRF1</b>  | p300                     |
|           | FOXP3                 | IRF2         | <b>PARP-14</b>           |
|           | <b>GBP1</b>           | IRF3         | PU.1                     |
|           | IFI56                 | IRF4         | RelA (p65 NF-kB subunit) |
|           | <b>IFIT1</b>          | IRF7         | <b>RIG-G</b>             |
|           | IFNAR2                | IRF8         | <b>STAT1</b>             |
|           | IFNGR1                | <b>IRF9</b>  | <b>STAT2</b>             |
|           | IGTP                  | ISG15        | STAT3                    |
|           | IL-1 beta             | <b>ISG54</b> | STAT6                    |
|           | IL-12 alpha           | LMIR4        | TLR2                     |
|           | IL-12 beta            | <b>MD-2</b>  | WNT3                     |

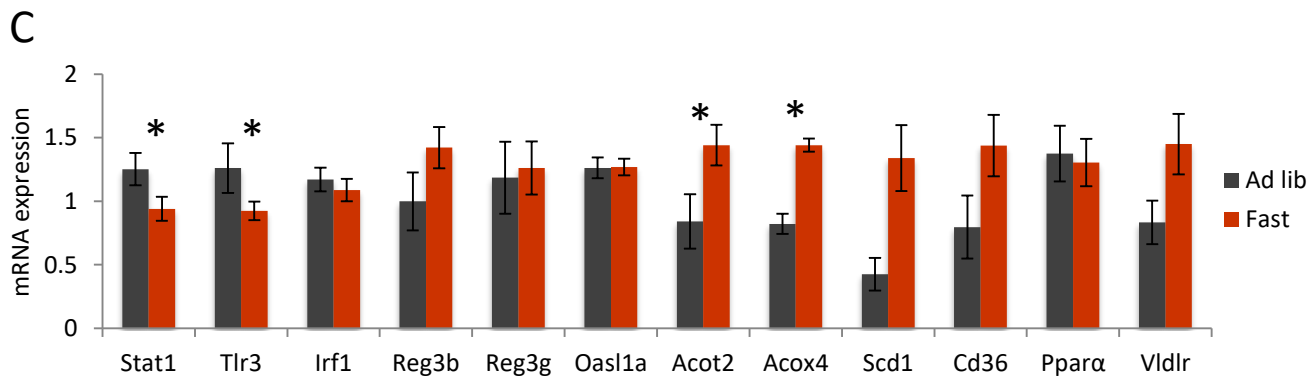

Figure S4

A

Drug metabolism  
 Fatty acid metabolism  
 PPAR signaling pathway  
 Retinol metabolism  
 Ribosome  
 acyl-CoA metabolic process  
 coenzyme metabolic process  
 cofactor metabolic process  
 fatty acid metabolic process  
 oxidation reduction  
 vitamin metabolic process

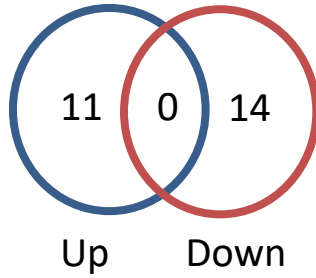

DNA packaging  
 cellular macromolecular complex assembly  
 cellular macromolecular complex subunit organization  
 cholesterol biosynthetic process  
 chromatin assembly  
 chromatin assembly or disassembly  
 lipid biosynthetic process  
 macromolecular complex assembly  
 macromolecular complex subunit organization  
 nucleosome assembly  
 nucleosome organization  
 protein-DNA complex assembly  
 steroid biosynthetic process  
 sterol biosynthetic process

B

Genes upregulated in at least two other tissues

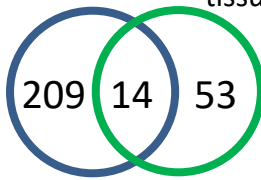

C

Genes downregulated in at least two other tissues

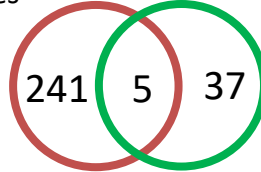

D

Duodenum upregulated genes and Duodenum downregulated genes

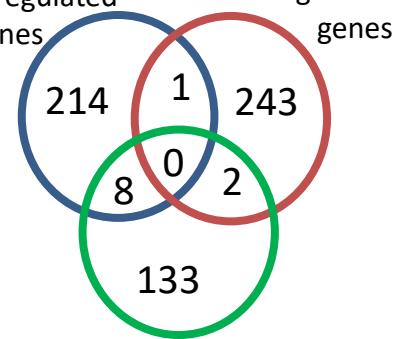

E

Duodenum upregulated genes and Duodenum downregulated genes

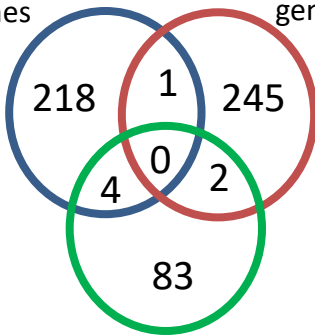

Heart genes

F

Duodenum upregulated genes and Duodenum downregulated genes

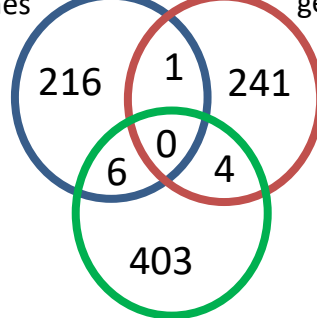

WAT genes

G

Gastrocnemius muscle genes and Duodenum upregulated/downregulated genes

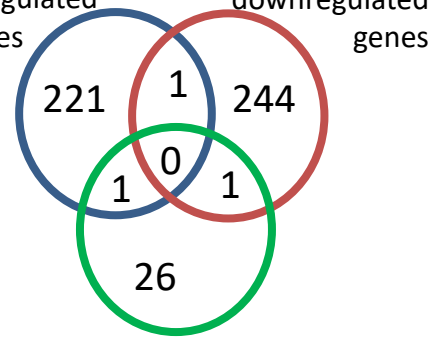

Immune tissues genes

H

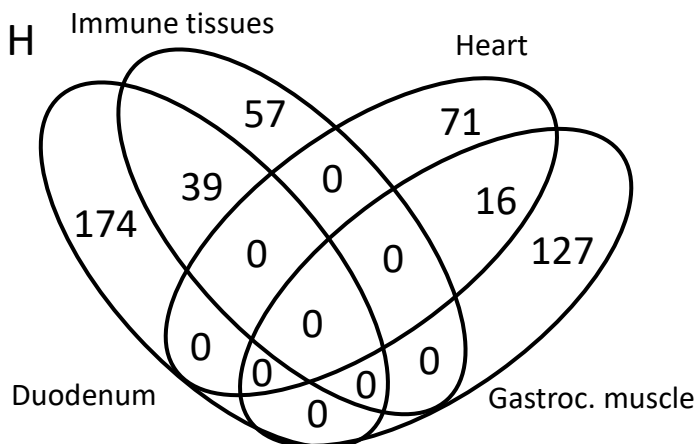

I

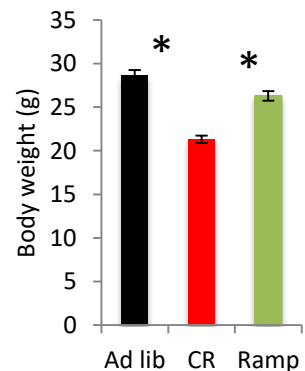

Figure S5

**A Feces: Phylum**

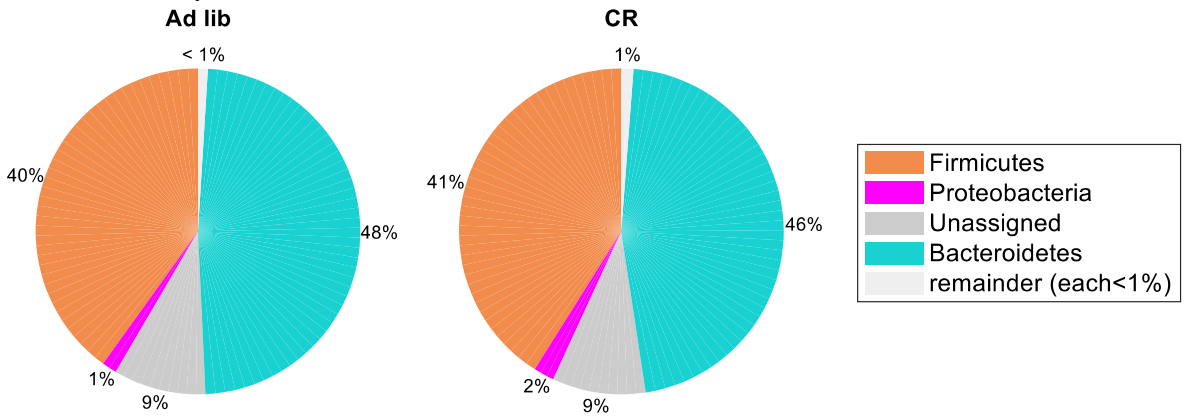

**B Feces: Class**

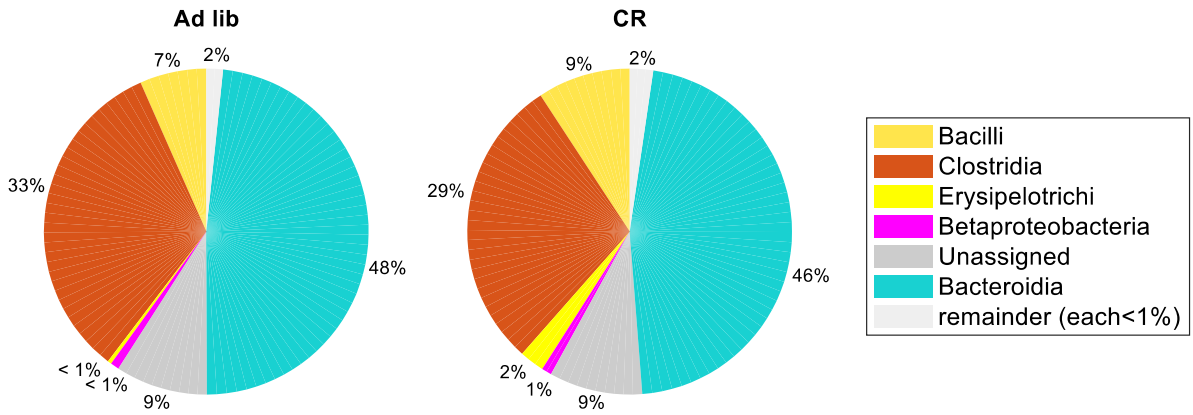

**C Feces: Family**

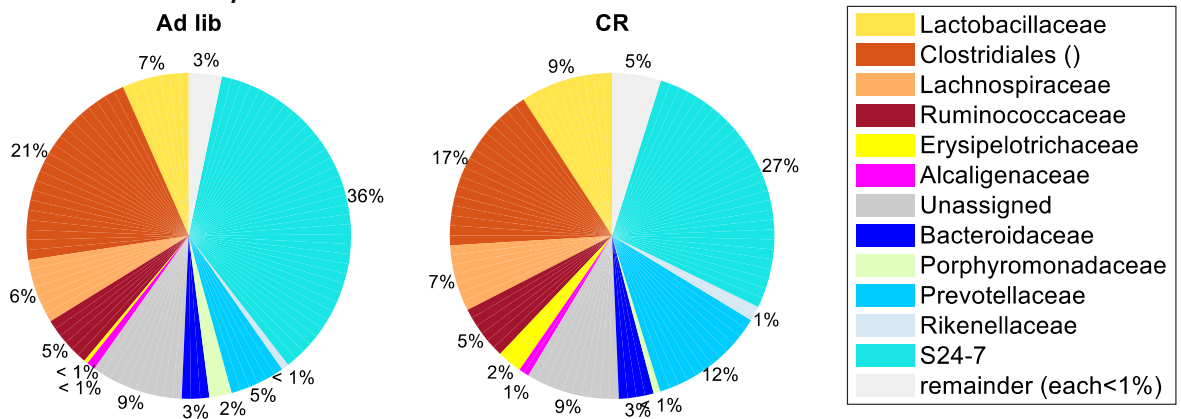

Figure S6

**D Small intestine: Phylum**

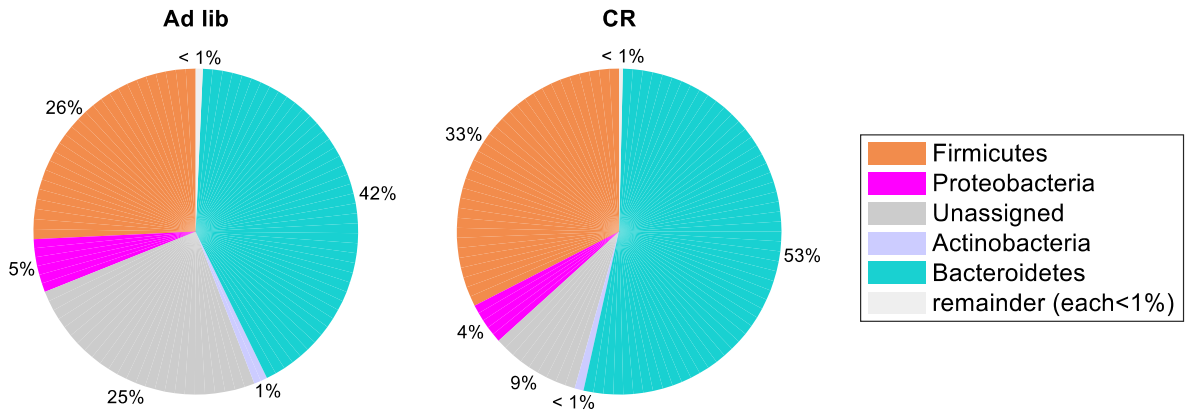

**E Small intestine: Class**

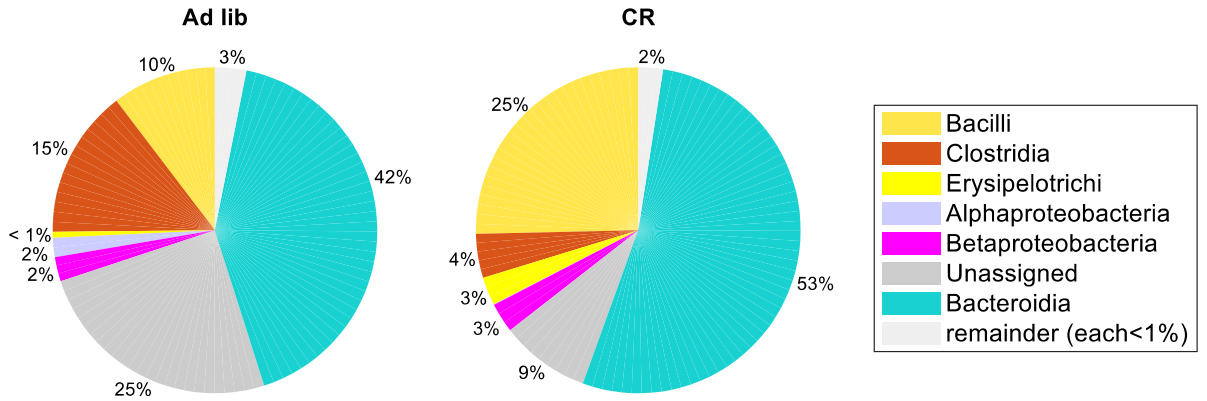

**F Small intestine: Family**

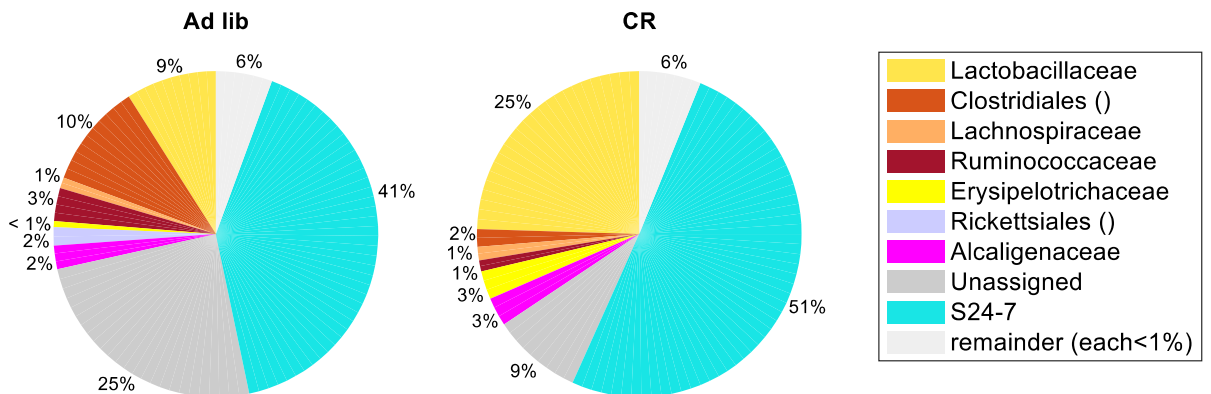

Figure S7

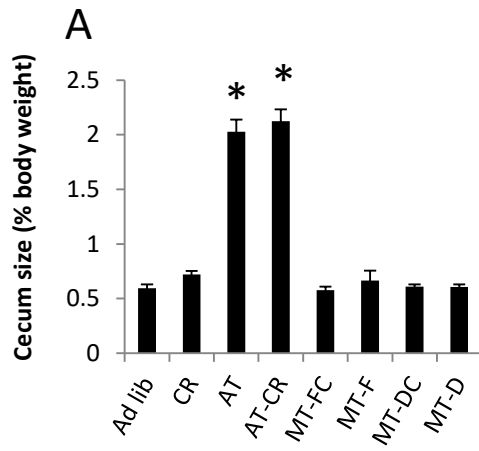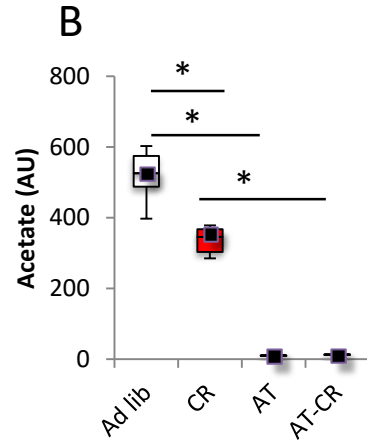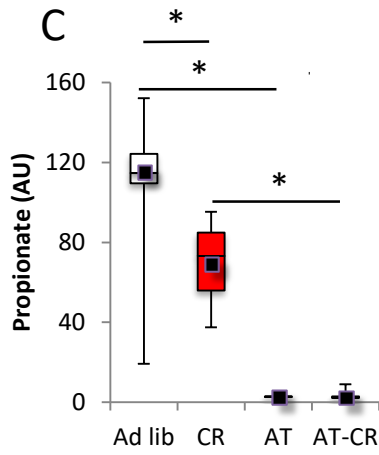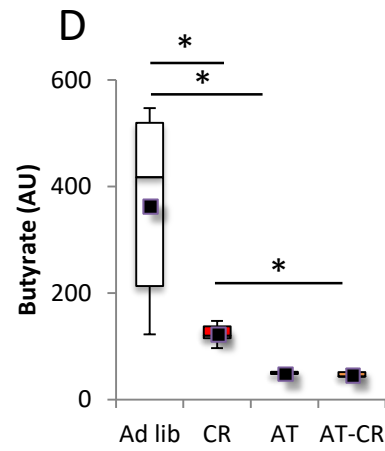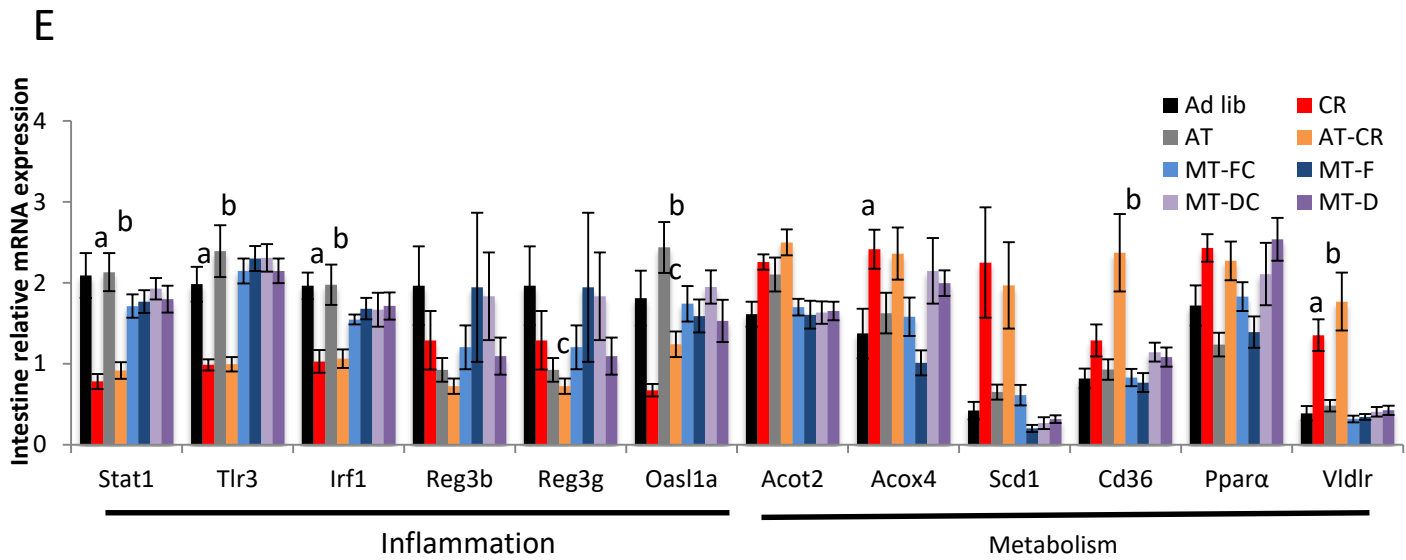

Figure S8

A

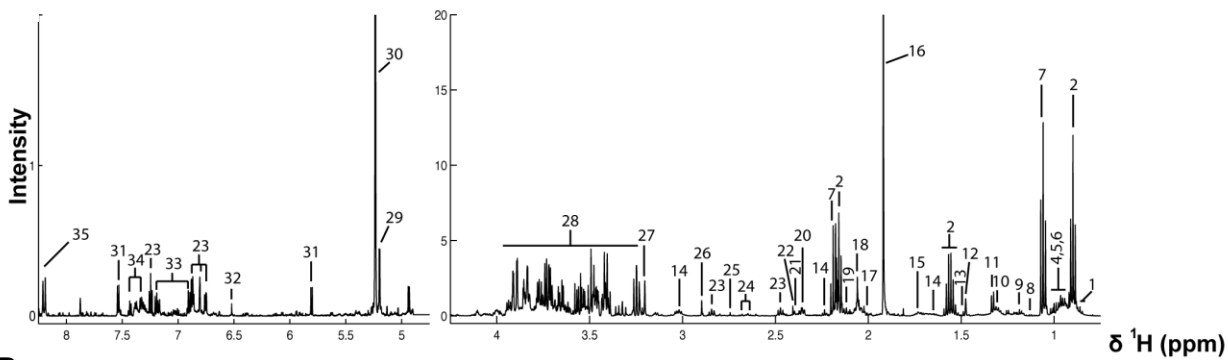

B

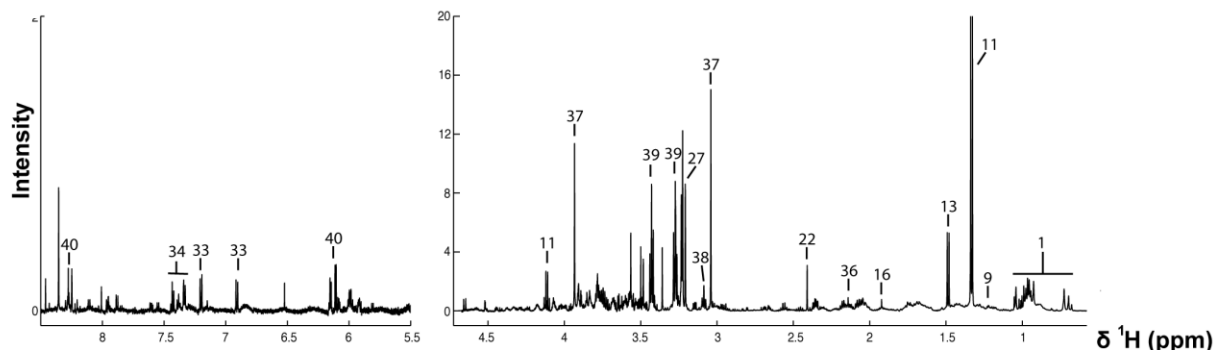

C

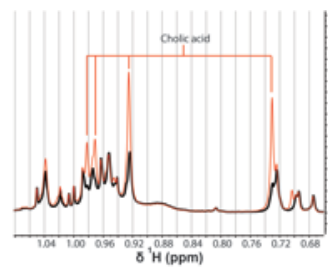

D

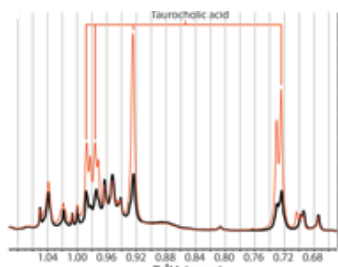

E

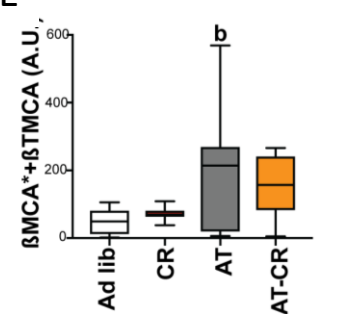

F

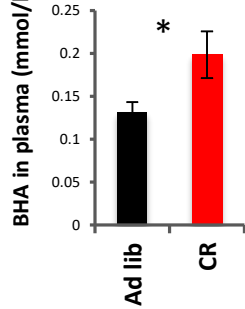

G

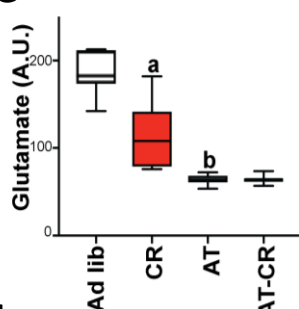

H

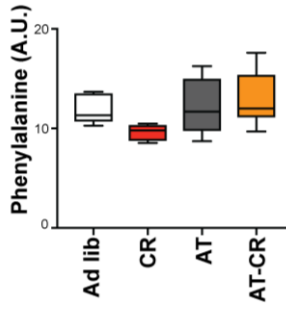

I

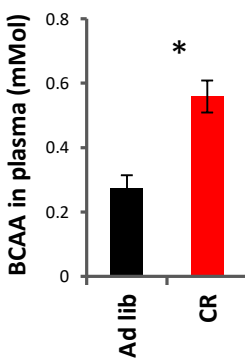

J

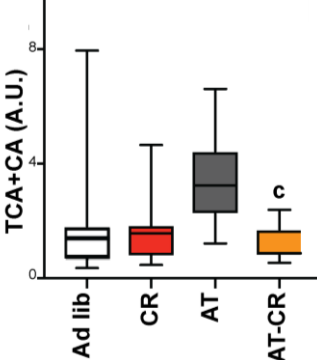

K

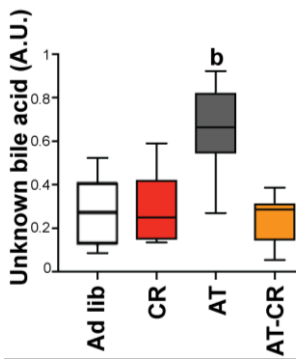

Supplement: 41598_2018_29815_MOESM2_ESM.pdf [file 41598_2018_29815_MOESM2_ESM.pdf]
